# Supplementary material for: Functional, water-dispersible gold nanoparticles produced with N,N′-bis(acryloyl)-(l)-cystine
Source: Royal Society of Chemistry journal article supplement (doi:10.1039/c5ra16700k), 2015-01-01
Supplement: c5ra16700k1.pdf [file c5ra16700k1.pdf]

## Electronic Supplementary Material (ESI)

### Functional, water-dispersible gold nanoparticles produced with *N,N'*-bis(acryloyl)-(L)-cystine

Andrea N. D. Kolb,<sup>a,b</sup> Joanne E. Harvey,<sup>a</sup> and James H. Johnston<sup>\*,a,b</sup>

<sup>a</sup> *School of Chemical and Physical Sciences and <sup>b</sup>the MacDiarmid Institute for Advanced Materials and Nanotechnology, Victoria University of Wellington, PO Box 600, Wellington 6140, New Zealand.*

*Fax: +64 4463 5241; Tel: +64 4463 5559; E-mail: jim.johnston@vuw.ac.nz*

#### List of Figures

|    |                                                                |    |
|----|----------------------------------------------------------------|----|
| S1 | <sup>1</sup> H NMR of CiBA. . . . .                            | S2 |
| S2 | <sup>1</sup> H NMR of CiBA with integrals of impurity. . . . . | S3 |
| S3 | Additional TEM images of CiBA–AuNPs. . . . .                   | S4 |

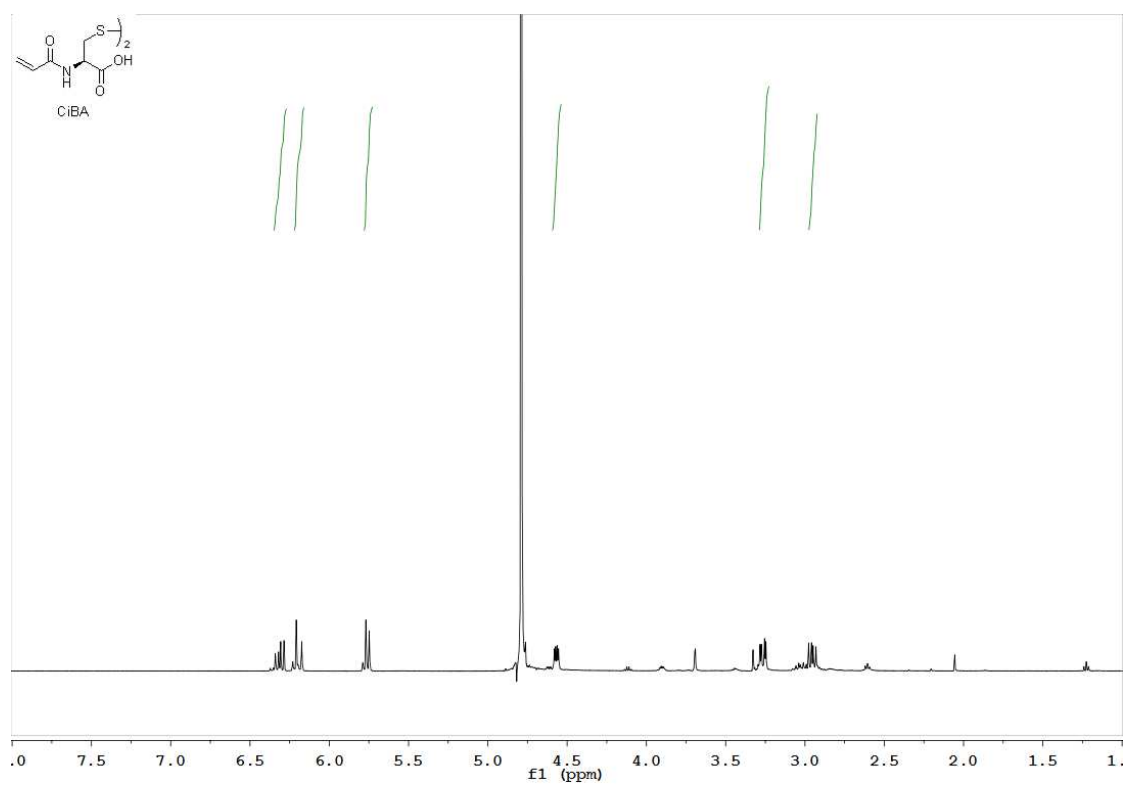

Figure S1:  $^1\text{H}$  NMR of  $N,N'$ -bis(acryloyl)-(L)-cystine (CiBA) in  $\text{D}_2\text{O}$ .

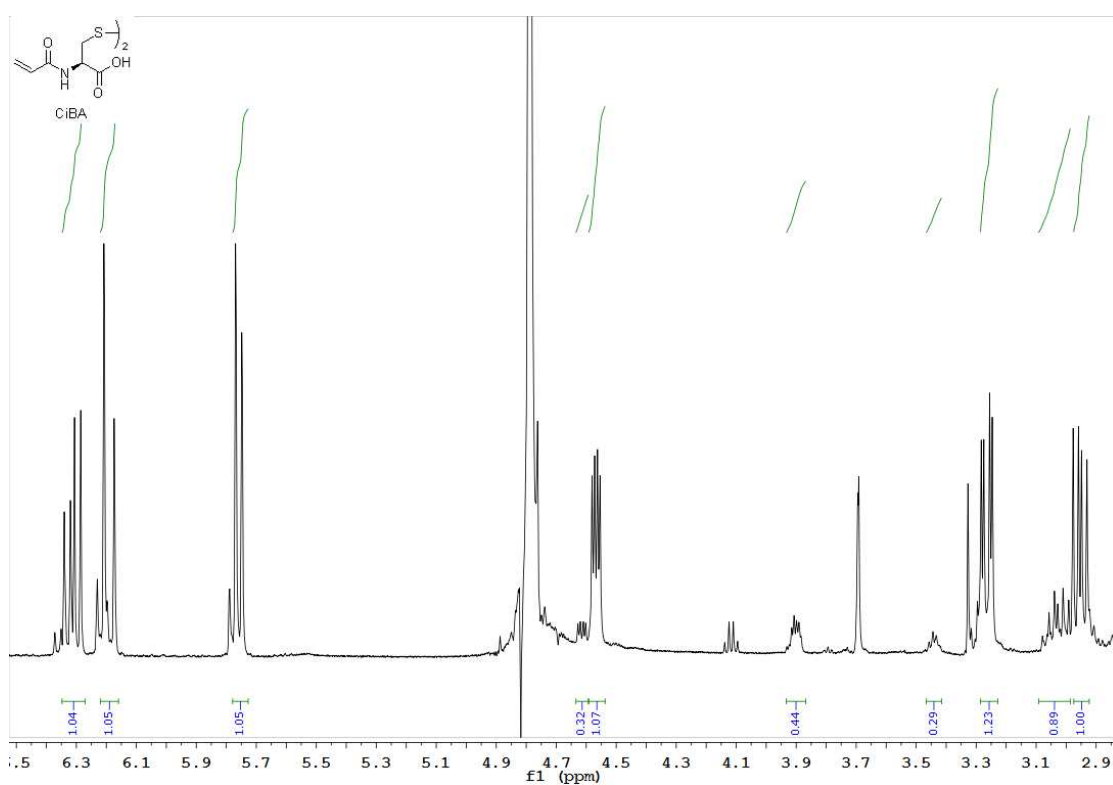

Figure S2:  $^1\text{H}$  NMR of CiBA in  $\text{D}_2\text{O}$  with integrals of impurity. The batch contained approximately 80% CiBA.

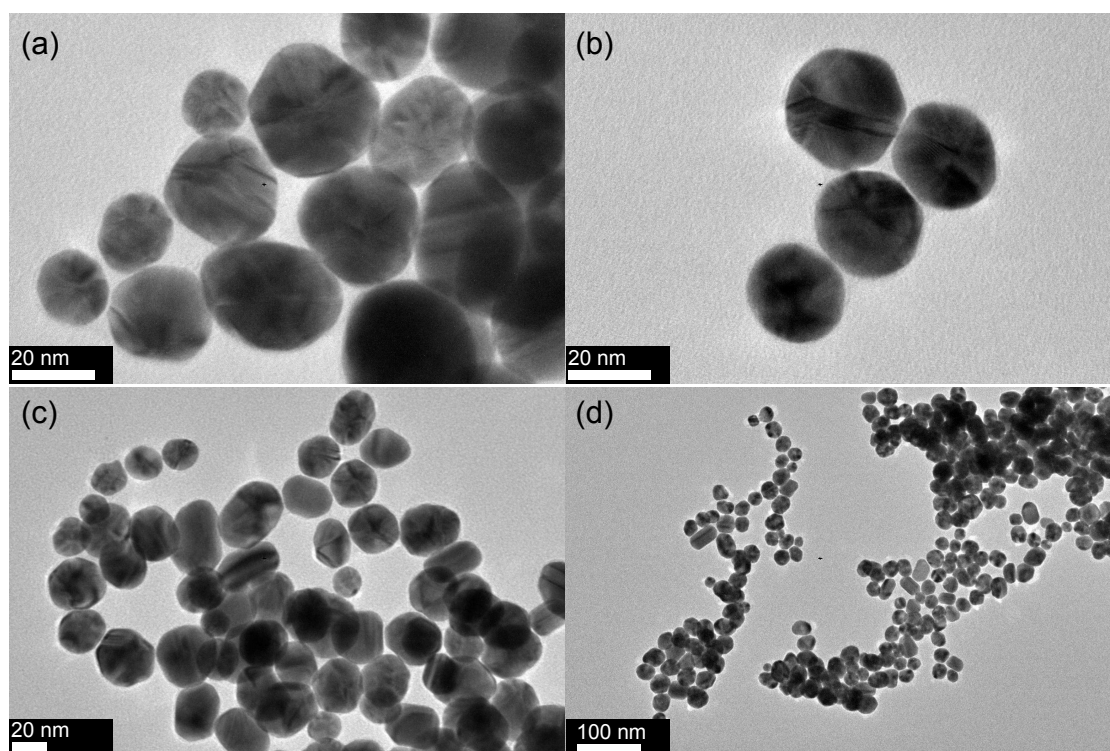

Figure S3: Additional TEM images of AuNPs with CiBA (CiBA–AuNPs). The majority of the particles was of isotropic shape.
